# Supplementary material for: Five-year follow-up of a cluster-randomized controlled trial of a client-centred activities of daily living intervention for people with stroke
Source: PubMed Central journal article supplement — Clin Rehabil. 2018 Nov 9;33(2):262–76. doi: 10.1177/0269215518809791 (PMC6348459; doi:10.1177/0269215518809791), 2018-11-09
Supplement: Supplemental_Material.pdf [file Supplemental_Material.pdf]

Supplemental Material

Table S1: Overview of instruments and measurements used in the five-year follow-up.

| Instrument/measurement                                                                          | Peoples with stroke |          |           |         | Significant others |           |         |
|-------------------------------------------------------------------------------------------------|---------------------|----------|-----------|---------|--------------------|-----------|---------|
|                                                                                                 | Baseline            | 3 months | 12 months | 5 years | 3 months           | 12 months | 5 years |
| Mini-Mental State Examination                                                                   | x                   |          |           | x       |                    |           |         |
| Barthel Index                                                                                   | x                   |          |           |         |                    |           |         |
| Stroke severity (Based on Barthel Index)                                                        | x                   |          |           |         |                    |           |         |
| Katz Extended Scale                                                                             | x <sup>a</sup>      | x        | x         | x       |                    |           |         |
| Self-Efficacy Scale                                                                             |                     |          |           | x       |                    |           |         |
| Formal/informal care: Home-help service, Personal assistance, Other regular help or supervision |                     |          |           | x       |                    |           |         |
| Stroke Impact Scale                                                                             |                     | x        | x         | x       |                    |           |         |
| Stroke Impact Scale: Recovery                                                                   | x                   |          |           | x       |                    |           |         |
| Fatigue Severity Scale                                                                          |                     |          |           | x       |                    |           |         |
| Reintegration to Normal Living Index                                                            |                     |          |           | x       |                    |           |         |
| Frenchay Activities Index                                                                       | x <sup>b</sup>      |          | x         | x       |                    |           |         |
| Occupational Gaps Questionnaire                                                                 |                     |          |           | x       |                    |           | x       |
| Lisat-11: "My life as a whole"                                                                  |                     | x        | x         | x       | x                  | x         | x       |
| Hospital Anxiety and Depression Scale                                                           |                     |          |           | x       |                    |           | x       |
| Caregiver's Burden Scale                                                                        |                     |          |           |         | x                  | x         | x       |
| Informal care: Personal ADL, Instrumental ADL, Other activities                                 |                     |          |           |         | x                  | x         | x       |
| Informal care: "To what extent do you assist?"                                                  |                     |          |           |         |                    |           | x       |

<sup>a</sup> Both pre-stroke situation and situation at inclusion were assessed at baseline.

<sup>b</sup> Reflects pre-stroke situation.
